# Supplementary material for: Presence of Mycoplasma bovis in Bulk Tank Milk and Associated Risk Factor Analysis in Serbian Dairy Farms
Source: MDPI journal article supplement (doi:10.3390/pathogens13040302), 2024-04-06
Supplement: s1 [file s1]

## Study: *Mycoplasma bovis* in bulk tank milk - risk factor analysis in Serbia

Researcher name: Milan Ninković

Name Farm:

Location:

Date:

### Questionnaire

|                                                  |                            |
|--------------------------------------------------|----------------------------|
| Number of cows at the farm                       | -----                      |
| Milk yield                                       | -----                      |
| Average of parity on the farm                    | -----                      |
| Number of cows in terms of BTM                   | -----                      |
| Presence of <i>M. bovis</i> mastitis             | YES/NO                     |
| Breed                                            | HF/SIM                     |
| Presence of bacterial mastitis                   | YES/NO                     |
| Do you use of disinfection before milking        | YES/NO                     |
| Do you use of disinfection after milking         | YES/NO                     |
| Type of farm                                     | family farm/corporate farm |
| Type of milking                                  | machine/manual             |
| Type of holding                                  | tie stall/free stall       |
| Presence of overcrowding of stall                | YES/NO                     |
| Presence of inadequate ambient condition on farm | YES/NO                     |

.....

Signature
